# Supplementary material for: Effects of Melatonin Supplementation during Pregnancy on Reproductive Performance, Maternal–Placental–Fetal Redox Status, and Placental Mitochondrial Function in a Sow Model
Source: MDPI journal article supplement (doi:10.3390/antiox10121867), 2021-11-24
Supplement: s1 [file s1]

**Table S1.** Ingredients and nutrient composition of the control diet (as fed basis)

|                                      | Control diet |
|--------------------------------------|--------------|
| Ingredients, %                       |              |
| Corn                                 | 62.39        |
| Dehulled soybean meal                | 13.10        |
| Fish meal                            | 2.00         |
| Flour                                | 10.00        |
| Corn starch                          | 10.00        |
| L-Lys HCl (78%)                      | 0.10         |
| L-Threonine (98%)                    | 0.02         |
| Limestone                            | 0.84         |
| Dicalcium phosphate                  | 0.46         |
| Salt                                 | 0.40         |
| Choline chloride (50%)               | 0.14         |
| Mineral premix <sup>1</sup>          | 0.50         |
| Vitamin premix <sup>2</sup>          | 0.05         |
| Total                                | 100.00       |
| Nutrient composition, % <sup>3</sup> |              |
| Digestible energy, Mcal/kg           | 3.36         |
| Crude protein                        | 13.39        |
| Calcium                              | 0.60         |
| Available phosphorus                 | 0.27         |
| Lysine                               | 0.60         |
| Methionine                           | 0.21         |
| Threonine                            | 0.46         |
| Tryptophan                           | 0.14         |

<sup>1</sup> Mineral premix provided per kilogram of diet: Cu 10 mg, Fe 100 mg, I 0.6 mg, Zn 100 mg, Mn 30 mg, Se 0.25 mg.

<sup>2</sup> Vitamin premix provided per kilogram of diet: VA 7500IU, VD<sub>3</sub> 5000IU, VE 37.5IU, VK<sub>3</sub> 5 mg, VB<sub>1</sub> 5 mg, VB<sub>2</sub> 12.5 mg, VB<sub>6</sub> 7.5 mg, VB<sub>12</sub> 0.05 mg, biotin 0.2 mg, niacin 50 mg, folic acid 2.5 mg, D-calcium pantothenate 25 mg, ethoxyquinoline 0.25 mg.

<sup>3</sup> Nutrient levels were calculated.

**Table S2.** Primer and probe sequences used for determination of mtDNA content.

| Gene                 | Genebank accession | Primer sequence                                  | Product size (bp) |
|----------------------|--------------------|--------------------------------------------------|-------------------|
| Mitochondrial D-loop | AF276923           | 5'-GATCGTACATAGCACATATCATGTC-3'                  | 198               |
|                      |                    | 5'-GGTCCTGAAGTAAGAACCAGATG-3'                    |                   |
|                      |                    | 5'- (FAM) CCAGTCAACATGCGTATCACCACCA(Eclipse) -3' |                   |
| $\beta$ -actin       | DQ452569           | 5'-CCCCTCCTCTCTTGCCTCTC -3'                      | 74                |
|                      |                    | 5'-AAAAGTCCTAGGAAAATGGCAGAAG -3'                 |                   |
|                      |                    | 5'- (FAM) TGCCACGCCCTTTCTCACTTGTCT (Eclipse) -3' |                   |

**Table S3.** Primer sequences of the target and reference genes.

| Gene     | Genebank accession | 5'-Primer (F)          | 3' -Primer (R)          | Product size (bp) |
|----------|--------------------|------------------------|-------------------------|-------------------|
| SOD      | NM_001190422.1     | TCCATGTCCATCAGTTTGG    | AGTCACATTGCCCAGGTCTC    | 131               |
| CAT      | NM_214301.2        | ACGCCTGTGTGAGAACATTG   | GTCCAGAAGAGCCTGAATGC    | 124               |
| GPX1     | NM_214201.1        | AAATGCTCACCCGCTCTTC    | GTCATTGCGACACACTGGAG    | 118               |
| Nrf2     | XM_003133500.5     | GCCCCTGGAAGCGTTAAAC    | GGACTGTATCCCCAGAAGGTTGT | 67                |
| HO1      | NM_001004027.1     | AGGCTGAGAATGCCGAGTTC   | TGTGGTACAAGGACGCCATC    | 90                |
| NQO1     | NM_001159613.1     | CCAGCAGCCCGGCCAATCTG   | AGGTCCGACACGGCGACCTC    | 160               |
| Bax      | XM_003127290.4     | CTGACGGCAACTTCAACTGG   | CGTCCCAAAGTAGGAGAGGA    | 200               |
| Bcl2     | XM_003121700.2     | AGCATGCGGCCTCTATTTGA   | GGCCCGTGGACTTCACTTAT    | 120               |
| Caspase3 | NM_214131.1        | GTGGGACTGAAGATGACA     | ACCCGAGTAAGAATGTG       | 190               |
| Ki67     | XM013983877.1      | GTCCTCAACAAGCCCGAGAA   | ATCTTCCTTCCCGGATGGCT    | 309               |
| Glut1    | XM_021096908.1     | GCCTGAGACCAGTTGAAAGCAC | CTGCTTAGGTAAAGTTACAGGAG | 155               |

|                |                |                       |                       |     |
|----------------|----------------|-----------------------|-----------------------|-----|
| Glut3          | XM_021092391.1 | TGCACGGGCTTTGTGCCGATG | AAGGAGGTGAAGATTAGGAA  | 132 |
| SNAT1          | XM_003355629   | AAGAACCTGGGCTATCTCGG  | TGTTGCGTTAGGACTCGTTG  | 138 |
| SNAT2          | NM_018976      | GTTACCTTTGGTGATCCAGGC | ACCAATGACACCAGCAGAACC | 96  |
| SNAT3          | XM_003355630   | GTTCTTTGCCTTCACTACTA  | GACCCAAGCCTCCAGATT    | 186 |
| Pept1          | NM_214347      | CCCAGGCTTGCTACCCAC    | ACCCGATGCACTTGACGA    | 144 |
| MT1            | XM_021078041.1 | GGTGGCTGTGTATCCGTACC  | TGACACTCAAGCCCATCAGG  | 110 |
| $\beta$ -actin | DQ845171.1     | GGCGCCCAGCACGAT       | CCGATCCACACGGAGTACTTG | 66  |

---

Glut1=Slc2a1, Glut3=Slc2a3, SNAT1=Slc38a1, SNAT2=Slc38a2, SNAT3=Slc38a4.
